1 **Barriers influencing implementation of patient safety incident reporting and learning**  
2 **guidelines in specialised care units, KwaZulu-Natal: A qualitative study**

3 T.M.H Gqaleni <sup>1</sup>, Siphon W. Mkhize <sup>1</sup>

4 <sup>1</sup>School of Nursing and Public Health, College of Health Sciences, University of  
5 KwaZulu-Natal, Durban, South Africa.

6 E-mail: [gqalenit@ukzn.ac.za](mailto:gqalenit@ukzn.ac.za). (TMH)

7

8

## **Abstract**

### **Background**

Globally, increased occurrences of Patient Safety Incidents have become a public concern. The implementation of Patient Safety Incidents incident reporting and learning guidelines is fundamental to reducing preventable patient harm. To improve the implementation of these guidelines in specialised care units in KwaZulu- Natal, the views of healthcare professionals were unearthed.

### **Aim**

This study explores the healthcare professional views toward the implementation of Patient Safety Incidents reporting and learning Guidelines in specialised care units.

### **Methods**

A descriptive, explorative qualitative approach, was used to collect qualitative data from healthcare professionals working in specialised care units. The study was conducted in SCUs of three purposely selected public hospitals in two districts of KwaZulu-Natal. Group discussions and semi-structured interviews were conducted from March to May 2021. Content data analysis was performed using Tesch's method of analysis process.

### **Results**

The main themes that emerged during data analysis were: Ineffective reporting system affecting the communication of PSI guidelines, Inadequate Institutional and management for the healthcare professionals, Insufficient education and training of healthcare professionals, and poor human resources affecting the implementation of PSI guidelines.

30 The findings highlighted that there were more major barriers to the implementation of PSI  
31 reporting and learning guidelines.

## 32 **Conclusion**

33 This study confirmed that PSI reporting and learning guidelines are still not successfully  
34 implemented in the specialised care units and the barriers to implementation were  
35 highlighted. For rigorous implementation in South Africa, the study recommends revised  
36 PSI reporting and learning guidelines, designed in consultation with the frontline healthcare  
37 professionals, consisting of standardised, simple -user-friendly reporting process as well as  
38 a better implementation strategy to guide the healthcare professionals. Continuous  
39 professional development programmes may play an important role in the facilitation of the  
40 implementation process.

## 41 **Introduction**

42 Globally, increased occurrence of Patient Safety Incidents (PSIs) and near misses have  
43 become a public concern, which includes South Africa [1]. Near misses are incidents or  
44 situations that have the potential to cause harm but did not reach the patient due to timely  
45 intervention, whereas Patient Safety Incident (PSI) is harm caused by medical  
46 mismanagement, instead of the underlying disease[2]. Globally, unsafe care is one of the  
47 top 10 leading causes of death in the world and up to 83% of harm is avoidable [3]. The  
48 Institute of Medicine reveals death related to PSIs varies from 44 000 to 98 000 people each  
49 year with high-cost implications [4-6]. According to Flott, Fontana (3), over 420 million  
50 hospitalisations each year around the world resulted in nearly 43 million PSIs, in 2013. An  
51 analysis by Organisation for Economic Co-operation and Development (OECD) found that  
52 15 percent of all hospital costs in OECD nations are due to patient harm from PSIs, with  
53 associated costs ranging between \$1.4 to \$1.6 trillion, each year [7]. According to Choi, Pyo  
54 (8), Lu, Ko (9), improving the hospital organization atmosphere is essential to facilitate  
55 useful communication of patient safety incidents.

56 In Swedish and Brazilian health services, barriers and facilitators that influenced patient  
57 safety were identified and the relevance of a multifaceted system perspective on patient  
58 safety problems and solutions was pointed out [10, 11]. According to [3, 9], patient safety  
59 is a multifactorial concept, driven by a complicated array of technical, human and system  
60 factors. Several studies have identified barriers influencing the implementation of PSIs  
61 reporting in healthcare settings including specialised care units (SCUs). These includes  
62 underreporting, punitive culture, lack of standardized reporting system, staff shortages, lack  
63 of safety culture, poor processing of incident reports, inadequate engagement of healthcare  
64 professionals, limited institutional support of incident reporting systems including  
65 inadequate usage of evolving health information technology [1, 12-17].

66 In middle and low-income countries (LMICs), almost one-third of patients who suffered  
67 PSIs died and four out of five of those incidences were preventable [18]. Moreover, 134  
68 million PSIs occur in hospitals due to unsafe care, resulting in 2.6 million deaths, each year  
69 (National Academies of Sciences and Medicine, 2018). Also, it is estimated that 75% of  
70 PSIs occur in the LMIC contexts, during hospital care and 10-15% of total deaths are as a  
71 result of poor quality care [3]. In South Africa, a study conducted in KwaZulu-Natal reveals  
72 high percentage of serious PSIs (47%) indicating poor implementation of PSI reporting  
73 guidelines and lack of improvement strategies [19]. While incidents reporting is considered  
74 a cornerstone to patient safety culture and quality improvement in healthcare [20, 21], under-  
75 reporting in hospitals worldwide is still a challenge[1, 22, 23].

76 In South Africa, the implementation of Patient Safety Incident Reporting and Learning  
77 Systems guidelines, as recommended by KwaZulu-Natal Department of Health (KZN  
78 DoH), in line with National Department of Health (NDoH 2017) has provided no clear  
79 evidence of the reduction of PSIs and if these guidelines are adequately implemented in  
80 SCUs. Gqaleni and Mkhize (17), affirmed that healthcare professionals' perception of  
81 knowledge of PSI reporting and learning guidelines was good, however, the perception of  
82 the implementation was poor. This study further recommended a revised implementation to  
83 improve the quality and safety of healthcare in (SCUs). For SCUs, to heighten the positive  
84 performance and practices of PSIs reporting and learning guidelines, the views of healthcare  
85 professionals needed to be unearthed. Therefore, the aim of the study was to explore and  
86 describe the views of the senior healthcare professionals regarding the implementation of  
87 Patient Safety Incident reporting and learning guidelines in specialised care units of  
88 KwaZulu- Natal.

## 89 **Materials and Methods**

### 90 **Study design and setting**

91 A descriptive, explorative qualitative approach, was used to collect qualitative data from  
92 healthcare professionals working in SCUs. The study was conducted in SCUs of three  
93 purposely selected public hospitals in two districts of KwaZulu-Natal. Two hospitals (A  
94 and C), situated in the eThekweni district, provide both secondary and tertiary services, and  
95 the third tertiary hospital (B) is in the uMgungundlovu district. The settings consisted of  
96 specialised care units that included both Critical Care Units (CCUs), where the most  
97 critically ill patients were admitted as well as High Care Units, where the recovering  
98 critically ill patients were transferred but still needed specialised care.

99 **Table 1: Inclusion and Exclusion criteria**

| <b>Inclusion</b>                                                   | <b>Exclusion</b>                                                                       |
|--------------------------------------------------------------------|----------------------------------------------------------------------------------------|
| Participants who were Operational Nurse Managers                   | Participants who were not Operational Nurse Managers                                   |
| Participants who were Assistant Nurse Managers                     | Participants who were not Assistant Nurse Managers                                     |
| Participants who were Consultant Medical doctors                   | Participants who were not Consultant Medical doctors                                   |
| Participants who were Monitoring & Evaluation Managers             | Participants who were not Monitoring & Evaluation Managers                             |
| Working experience of more than 10 years in specialised care units | Participants who did not work in these units and had less than 10 years of experience. |
| Willingness to participate                                         | Not willing to participate                                                             |

100

## 101 **Population, recruitment and sampling**

102 Sampling is a process of selecting a portion of the population to represent the entire  
103 population, so that inferences about the population can be made [24]. The target population  
104 for this study consisted of senior healthcare professionals, who were involved in the  
105 implementation of PSI reporting and learning guidelines in the SCUs. Therefore, the  
106 participants that were purposely selected were had expertise and experience in SCUs  
107 environments and had vast experience in the handling of PSI reporting and learning  
108 guidelines. The focus group discussions sample was comprised of Operational Nurse  
109 Managers (OMs). Individual interviews included Assisting Nurse Managers (ANMs),  
110 Monitoring, and Evaluation Managers (M&E), and Consultant Medical doctors (CMD).

## 111 **Recruitment strategy**

112 Appointments were made by the researcher with the institutions' Senior Nurse Managers  
113 and Operational Nurse Managers and all the participants prior to data collection. The  
114 researcher had a briefing session with the participants, prior to data collection, explaining  
115 the aim of the study and its importance to research. Participants were informed that they  
116 were not forced to participate and that they had a right to withdraw from the study even if  
117 they had already given consent, without any negative consequences, thus ensuring voluntary  
118 participation.

## 119 **Data collection process**

120 This study was conducted during COVID-19 and the researcher followed the protocols. The  
121 data were collected virtually to ensure social distancing, which was reinforced in the  
122 boardrooms, including the use of personal protective equipment by the participants. Data

123 was collected over a period of 3 months, from August to October 2021. Information  
124 guidelines guided the focus group discussions and individual interviews, which consisted of  
125 topics and probing questions to elicit more detailed information from the participants. The  
126 researcher prepared one essential question with a list of probing open-ended questions,  
127 although the participants were encouraged to speak freely about the topic, to obtain all the  
128 information required.

129 Focus groups discussions, which consisted of Operational Nurse Managers, working in the  
130 selected settings, as they formed homogeneous participants. These participants were also at  
131 the forefront of implementing the PSI reporting and learning guidelines. Individual  
132 interviews consisted of senior participants which were heterogeneous, i.e. Assisting Nurse  
133 Managers, Monitoring, and Evaluation Managers, and Consultant Medical Doctors to solicit  
134 more in-depth information. The probing questions were influenced by the participants'  
135 responses and the interviewer sought clarity to minimize bias and subjectivity. Data were  
136 collected until saturation was reached, that is, no new information will be emerging.  
137 Interviews were conducted and lasted between 45 minutes to 60 minutes, and this allowed  
138 the participants to freely elaborate on their opinions on the phenomenon. Participants gave  
139 consent to record all the interviews and the researcher transcribed the data verbatim.

## 140 **Ethical considerations**

141 The University of KwaZulu-Natal's Human Science Research Ethics Committee  
142 (HSSREC/00001651/2020), and the Directorate: Health Research and Knowledge  
143 Management Unit (NHRD Ref: Kz\_202010\_0240), granted ethical clearance and  
144 permission to conduct the study before data collection. Gatekeepers' permission was also  
145 obtained from the Chief Executive Officers, heads of department and Senior Nurse  
146 Managers. A verbal consent to participate and to the recording of the interview voices were

147 obtained from the participants prior to data collection. Grove, Burns (25) asserted that the  
148 researcher must comply with three principles as stated by the Belmont report, namely; the  
149 principle of beneficence, the principle of human dignity, and justice. The participants were  
150 informed of their rights to withdraw from the study at any time, without any negative  
151 repercussions.

## 152 **Data analysis**

153 Content data analysis was conducted using Tesch's method of the analysis process [24].  
154 Transcribed interviews were read several times and descriptive words were identified for  
155 the formulation of thematic statements and concepts that created meaning. Notes were made  
156 with ideas that came to mind. Each interview was read through and the underlying meaning  
157 behind the scripts was determined. Notes were made on transcripts during the reading  
158 process. A list of concepts was made and similar topics were clustered together. These  
159 clustered topics were then be mapped as major topics. Raw data comprising transcripts were  
160 reviewed again in the light of identified topics. The text was coded and organised.  
161 Descriptive words were identified in the text and used to describe themes or topics. Related  
162 topics were grouped together. A final decision regarding categories was made. Preliminary  
163 analysis was made and excerpts from the data supporting the identified categories and  
164 themes was coded and recoded. A reflective journal was used to form themes and sub-  
165 themes.

## 166 **Trustworthiness**

167 During the research process, the researcher applied four criteria, to determine  
168 trustworthiness, namely, credibility, dependability, confirmability and transferability [26].

169 **Credibility.** According to Polit and Beck (27) credibility refers to the confidence in the  
170 truth of the data and its interpretations, that is, the data must reveal what it is searching for.  
171 The researcher ensured that this study was conducted in an authentic manner and the  
172 researcher had a prolonged engagement with the participants, during the data collection  
173 process, which assisted in gaining an in-depth understating of the phenomena under study.

174 **Dependability.** In this study the researcher provided detailed information of the research  
175 process, findings and recommendations, so that the other prospective researchers could  
176 replicate the study to their context. According to Polit and Beck (27), findings of an inquiry  
177 must be able to be repeated and replicated with the same participants in the same context.

178 **Confirmability.** Confirmability refers to objectivity, that is, the potential for congruence  
179 between two or more independent people about data's accuracy, relevance, or meaning [27].  
180 In this study, the research report conveyed participants' experiences and not the perspectives  
181 of the researcher. Themes generated during data collection reflected the tone of the  
182 participants.

183 **Transferability.** Transferability refers to the extent to which findings can be generalized  
184 and applied in other settings or groups [27]. In this study the researcher was responsible for  
185 providing a detailed account of the research process, findings and recommendations, so that  
186 the other prospective researchers could evaluate the applicability to their context.

## 187 **Results**

### 188 **Introduction**

189 Data were collected from the purposively selected participants until data saturation was  
190 reached. Data analysis was conducted manually using the eight steps of Tesch's method of

191 analysis. The first section provides the participants' demographics, as illustrated in Table 2  
 192 and the second section outlines the findings of the study, thoughts and feelings expressed  
 193 by the participants during the in-depth interviews. The names of the participating hospitals  
 194 and the participants were not divulged to protect their identities.

195 **Table 2: Demographics of the participants**

| Hospital                       | Gender             | Job level                         |
|--------------------------------|--------------------|-----------------------------------|
| <b>Focus group discussions</b> |                    |                                   |
| Hospital A                     | 7 Females; 3 Males | Operational managers              |
| Hospital B                     | 8 Females; 2Males  | Operational managers              |
| Hospitals C                    | 6 Females; 2Males  | Operational managers              |
| <b>Individual interviews</b>   |                    |                                   |
| Hospital A                     | 1 Female           | Assistant Nurse Managers          |
| Hospital B                     | 1 Male             | Assistant Nurse Managers          |
| Hospitals C                    | 1 Female           | Assistant Nurse Managers          |
| Hospital A                     | 1Female; 2 Males   | Consultant Medical doctor         |
| Hospital B                     | 1 Female; 2 Males  | Consultant Medical doctor         |
| Hospitals C                    | 1 Male             | Consultant Medical doctor         |
| Hospital A                     | 1 Female           | Monitoring and evaluation Manager |
| Hospital B                     | 1 Male             | Monitoring and evaluation Manager |
| Hospitals C                    | 1 Female           | Monitoring and evaluation Manager |

196  
 197 Note: **FGD**- Focus group discussion

198 **OM**- Operational Nurse Manager

199 **ANM**-Assistant Nurse Manager

200 **M&E**- Monitoring and Evaluation managers

201 **CMD**- Consultant Medical doctor

202 A summary of themes and subthemes that emerged during data analysis is presented in Table  
 203 3.

204 **Table 3: Themes and subthemes**

| <b>Theme</b>                                                                | <b>Description of a theme</b>                                                                                                                     | <b>Sub-themes</b>                                                                                                                                                                                |
|-----------------------------------------------------------------------------|---------------------------------------------------------------------------------------------------------------------------------------------------|--------------------------------------------------------------------------------------------------------------------------------------------------------------------------------------------------|
| 1. Ineffective reporting system affecting communication of PSI guidelines   | Communication factors are associated with the communication of PSI reporting and learning guidelines as perceived by the healthcare professionals | 1.1 Tedious, long and not simple<br>1.2 Unclear PSI guidelines and policies<br>1.3 Lack of consultation at the forefront level<br>1.4 Inadequate feedback to staff and family                    |
| 2. Inadequate Institutional and management for the healthcare professionals | Institutional support relates to the support received by healthcare workers within the institution                                                | 2.1 A hostile environment characterized by hierarchical structure and red-tape<br>2.2 Punitive culture<br>2.3 Lack of management support to frontline healthcare workers<br>2.4 Lack of teamwork |
| 3. Insufficient education and training of healthcare professionals          | Education and training refer to both qualification and expertise of healthcare professionals                                                      | 3.1 Inadequate training of healthcare professionals on PSIs<br>3.2 Lack of knowledge on how to construct the report properly<br>3.3 Lack of formal training of healthcare professionals          |

3.4 Lack of formal training, in-house training, and continued professional development programme.

|                                                                        |                                                                                                                                                 |                                                                                                                                              |
|------------------------------------------------------------------------|-------------------------------------------------------------------------------------------------------------------------------------------------|----------------------------------------------------------------------------------------------------------------------------------------------|
| 4. Poor human resources affecting the implementation of PSI guidelines | Human resources refer to the factors that the healthcare professionals perceived as availability of competent staff to implement PSI guidelines | 4.1 Shortage of staff<br>4.2 Inadequate competent a skill mix<br>4.3 High staff turnover and lack of staff retention<br>4.4 Busy environment |
|------------------------------------------------------------------------|-------------------------------------------------------------------------------------------------------------------------------------------------|----------------------------------------------------------------------------------------------------------------------------------------------|

205 The views of some of the participants are presented as direct quotations to support the  
206 identified themes and sub-themes.

207 **Theme 1: Ineffective reporting system affecting communication of PSI**  
208 **guidelines**

209 Communication factors are associated with the communication of PSI reporting and  
210 learning guidelines as perceived by the healthcare professionals. Participants had a  
211 perception that communication was ineffective and not user-friendly to implement PSI  
212 reporting and learning guidelines. Most participants stated that the actual structure of the  
213 reporting system makes it difficult for the healthcare professionals to effectively implement  
214 the guidelines.

215 **Subtheme 1.1: Tedious, long and not simple**

216 The participants indicated that the reporting process was long and intense, tedious and  
217 laborious, hence other PSIs were not reported.

218 *“It is a long form...the new form is very intense, apart from the report that you’re going*  
219 *to write.... not simple at all.” (ANM1, Hospital A, Female, from Individual interview)*

220           *“The time that it takes to fill in the PSI forms and then the possibility of further meetings*  
221           *down the line, it is essentially inconvenience from the interview process, a very*  
222           *laborious, inconvenient process.” (CMD1, Hospital C, Male, from Individual*  
223           *interview)*

224           **Subtheme 1.2: Unclear PSI guidelines and policies**

225           The healthcare professionals also stated that the guidelines were not clear, confusing and  
226           not standardised. This was considered a barrier to effective implementation of the  
227           guidelines.

228           *“The guidelines are not particularly clearer on when an adverse event can be*  
229           *considered as just expected as a consequence of the disease for a particular patient*  
230           *versus a true PSI. Our government is using their own terminology which is*  
231           *unfortunately not based on international standards.” (CMD2, Hospital A, Male, from*  
232           *Individual interview)*

233           Some participants verbalised that there was a mismatch of the guidelines with the actual  
234           work environment

235           *“Action plans and policies are nice and they are there, it's something that is there and*  
236           *are nice to read, but when it comes to practicality of it..... guidelines may look good on*  
237           *paper, but they are not effectively implemented.” (OM2, Hospital A, Female, from*  
238           *FGD)*

239           **Subtheme 1.3: Lack of consultation at the forefront level**

240           Healthcare professionals also reported a lack of consultation at the forefront level and non-  
241           clinical involvement during the development phase of PSI reporting and learning guidelines.

242           *“I was never consulted... I just received a directive from the DOH and my concern is*  
243           *that the people that develop these guidelines are not clinical, they have no*

244 *understanding of what is happening on the ground, they have no medical training.”*  
245 *(CMD2, Hospital A, Male, from Individual interview)*

246 *“I didn't have any input, maybe from other managers. I just received a new form from*  
247 *the province informing us what is required.” (ANM2, Hospital A, Male, from*  
248 *Individual interview)*

#### 249 **Subtheme 1.4: Inadequate feedback to staff and family**

250 Inadequate feedback to staff and family was also identified by the participants as barrier to  
251 the implementation of PSI reporting and learning guidelines. Lack of feedback was more  
252 from the senior management and was more of a redress meeting. Partial family involvement  
253 if a PSI has occurred, near misses are usually overlooked because it is perceived as harm  
254 that did not reach the patient.

255 *“So, people might say okay, what do we need to disclose that to the family because it*  
256 *was a near miss. It wasn't a miss. The patient didn't suffer any harm.” (CMD1, Hospital*  
257 *C, Male, from Individual interview)*

258 *“I've never had feedback. And I've done multiple incident reports reporting over the*  
259 *years, never, ever, ever, ever had.... you would expect documents and feedback. You*  
260 *don't ever get any feedback from them. It is a waste of time because you get nothing*  
261 *back. Then the next time something happens you go.... I'm not going to do it again*  
262 *because what was the point?” (CMD1, Hospital B, Female, from Individual interview)*

263 **Theme 2: Inadequate Institutional and management for the healthcare**  
264 **professionals**

265 Most participants expressed a lack of support, especially from the senior management, a  
266 disjuncture of the leadership from the challenges experienced by the frontline workers,  
267 resulting in poor of teamwork.

268 **Subtheme 2.1: Punitive culture**

269 Most participants reported that there is a punitive culture associated with the implementation  
270 of PSI reporting and learning guidelines. This was characterised by fear of the negative  
271 repercussions when healthcare professionals attempt to comply, therefore this led to  
272 underreporting of most PSIs.

273 *“Sometimes this leads to disciplinary measures. Sometimes you say, I’m going to give*  
274 *you a warning. And the PN will complain that I committed myself by reporting, and now*  
275 *I must face the negative consequences. They even threaten to consult the unions.”*  
276 *(ANM1, Hospital B, Male, from Individual interview)*

277 *“Also, people have a view that it is punitive, in a way... so, I have seen different*  
278 *departments threaten each other with PSIs... eh... so if you call something a PSI there*  
279 *is still very much a mindset that this is an accusation... and it is even been recognised*  
280 *between departments to sort of thresh out their politics..... been used between*  
281 *departments as a sort as a blame. Even various people are using it almost*  
282 *punitively...aggressively” (CMD1, Hospital C, Male, from Individual interview)*

283

284

285 **Subtheme 2.2: A hostile environment**

286 Participants described environment as hostile, characterized by hierarchical structure and  
287 red-tape resulting reluctance in the implementation of PSI guidelines by the healthcare  
288 professionals.

289 *“registered nurses that fear, they don't want to report that that's why they are under-*  
290 *reporting, because that fear you don't have support. It's always like a threatening*  
291 *environment. All they've learned is that they must keep quiet. And what if I get fired?”*  
292 *(CMD3, Hospital A, Female, from Individual interview)*

293 *“To me it's like your call to the court where you're gonna sit and when they discuss this*  
294 *incident you feel that I am... I am on the wrong...” (OM1, Hospital B, Female, from*  
295 *FGD)*

296 **Subtheme: 2.3 Lack of management support to frontline healthcare workers**

297 In addition, participants expressed a lack of guidance when trying to implement reporting  
298 and learning guidelines. Participants verbalised that an enabling environment is crucial,  
299 therefore inadequate organisational resources, patient safety committees that are not fully  
300 functional, lack of implementation strategies to guide healthcare professionals and learning  
301 opportunities were regarded as barriers.

302 *“There is lack of support. Because... we are OMs, we work with staff, and we've got*  
303 *challenges. You need somebody to listen to you, if you say this and this is happening.*  
304 *Instead, you're blamed.... you are criticised... you... you... you really feel bad.” (OM2,*  
305 *Hospital B, Female, from FGD)*

306           *“no one's learning from the previous mistakes And there's always another excuse. You*  
307           *just hit your head against the wall.” (CMD1, Hospital B, Female, from Individual*  
308           *interview)*

309           Participants also verbalised that patient safety committees were not existing, and those that  
310           were existing were at a development stage.

311           *“But from what I hear they just getting it up and running and getting some processes in*  
312           *order. I think the first steps are happening there... I view it as the start of the process.*  
313           *but I don't know if we've quite got the systems at the unit level... we don't have the unit*  
314           *SOP or patient safety committees on how to deal with a PSI... it is more of an ad-hoc*  
315           *base ...” (CMD2, Hospital A, Female, from Individual interview)*

316           *“I'm not aware of any Patient Safety committee that exists. I don't even know what*  
317           *happens what the process is after I've handed the form as far as it goes from the ward*  
318           *to the ANM... that's the point of the SOP. I don't know what happens after that, which*  
319           *is bad as well, because we need to know the entire process... it's all... it's all very*  
320           *haphazard”. (CMD2, Hospital C, Male, from Individual interview)*

#### 321           **2.4 Lack of teamwork**

322           Participants reiterated that there should be a learning experience during the implementation  
323           of reporting and learning guidelines, not to blame someone. Participants reported that a  
324           teamwork approach between departments and collaboration with other institutions was  
325           lacking.

326           *“We rely on nurses on the reporting of the PSI for formal reporting as such, because of*  
327           *a busy environment.” (CMD2, Hospital A, Male, from Individual interview).*

328            *“Although we morbidity and mortality meetings where we discuss the PSIs as staff,*  
329            *there is still that lack with collaboration with other institutions, we hardly meet...I don't*  
330            *remember us meeting.....so there is a gap there.” (ANM1, Hospital B, Male, from*  
331            *Individual interview)*

332

### 333    **Theme 3: Insufficient education and training of healthcare professionals**

334            Participants reported that education and training associated with implementation of PSI  
335            reporting and learning guidelines, was multifaceted. The education and training challenges  
336            included the actual formal education of registered nurses, lack of training in specialisation  
337            of critical care, inadequate in-service training and workshops, to empower the participants  
338            on the guidelines. Furthermore, The PSI guidelines were not made, freely available and  
339            common knowledge to all the disciplines of departments.

#### 340    **Subtheme 3.1: Lack of formal training of healthcare professionals**

341            Participants confirmed that some of the nurses that were allocated to the specialised units  
342            did not have the formal training and the skill that is required in this environment.

343            *“In most cases we were not even sure of their training course, as they were training in*  
344            *these schools ...mushrooming everywhere, and now come in as ENAs and passed, they*  
345            *now want to be PNs, but still behaving like ENs...running the ward and there is no*  
346            *senior sister. You face these challenges, as they were the ENs recently and that affects*  
347            *the quality of nurses we employ.” (ANM2, Hospital A, Male, from Individual*  
348            *interview)*

349            *“People don't know how to identify PSIs are? How do you report...There's a total lack*  
350            *of education here...? So, you can't blame the individuals if they weren't educated in*

351 *this ..... and so I do think there's a major problem.” (CMD 2, Hospital A, Female, from*  
352 *Individual interview*

353 **Subtheme 3.2: Lack of knowledge on how to construct the report properly**

354 Furthermore, the participants indicated that the reporting system is not user-friendly with  
355 terminology that was not easy to understand. Although the participants knew about the  
356 classification of PSIs, the reporting process was complex.

357 *“I think the cause is a lack of knowledge of how to write a PSI...Lack of knowledge on*  
358 *how to construct properly... how to report properly, the whole incident... it has to be*  
359 *concise ...it has to be to the point, so if it is not written properly, I send it back...so it’s*  
360 *more time needed.” (ANM1, Hospital A, Female, from Individual interview)*

361 *“Then I mean, I’ll say to the doctors you must fill out an incident reporting form and*  
362 *they’ll go ...What?... that nobody knows what it is. What to do with it.” CMD1, Hospital*  
363 *A, Male, from Individual interview)*

364 **Subtheme 3.3: Lack of formal training, in-house training, and continued professional**  
365 **development programme**

366 Participants further indicated that there was insufficient continued professional development  
367 programme to empower the healthcare professionals to construct the report properly.  
368 Participants expected to have a common knowledge for all healthcare professionals and to  
369 be familiar with the guidelines.

370 *“The perception that the staff is not adequately trained to identify the PSIs and to*  
371 *disclose to patients and relatives.” (ANM2, Hospital A, Male, from Individual*  
372 *interview)*

373 *“I think.... even the more senior clinician struggled to decide what is the PSI and what*  
374 *isn't a PSI...ah... so, do you do label something a PSI” (CMD1, Hospital C, Male, from*  
375 *Individual interview)*

376 **Subtheme 3.4: Inadequate training of healthcare professionals on PSIs**

377 Some participants reported that some of the items that are in the PSI reporting and learning  
378 guidelines were well understood. They explained that some of the PSIs were expected as  
379 normal process of the underlying illness.

380 *“Sometimes some of the items that are been included in those PSIs are not particularly*  
381 *appropriate to the ICU, because its normal to follow the normal pathology in ICU.”*  
382 *(CMD2, Hospital B, Male, from Individual interview)*

383 **Theme 4: Poor human resources affecting the implementation of PSI**  
384 **guidelines**

385 Most participants confirmed that inadequate competent, knowledgeable and experienced  
386 was a huge barrier to effective implementation of PSI reporting and learning guidelines. The  
387 inadequate staff allocation was exacerbated during COVID-19 pandemic.

388  
389 **4.1 Subtheme: Shortage of staff**

390 Specialised units are busy by nature, and normally a ratio of 1:1, that is comprised of  
391 adequate skills mix. Participants stated that it was impossible to achieve this ratio, therefore  
392 affecting the implementation of guidelines and compromised quality patient care.

393 *“the... conditions that we working in are not allowing us to make sure can uhhh.... we*  
394 *try and ensure, but there isn't adequate staff that staff is adequate, I mean people who*

395           *are who work here every day, and who knows what is happening here and not people*  
396           *that I will be orientating. But the situation is that instead of having staff in this ward to*  
397           *work, according to the guidelines, or the policy we still get people from all over who*  
398           *will come here not knowing exactly what to do. Shortage itself is a big issue*  
399           *(emphatically) You get somebody that has just qualified as PN, she has never worked in*  
400           *a ward, she's just new...new PN She hasn't seen a ventilator she's seeing the ventilator*  
401           *for the first time. She's seeing the monitor for the first time.” (OM5, Hospital B,*  
402           *Female, from FGD)*

#### 403           **Subtheme 4.2: Inadequate competent a skill mix**

404           Participants also indicated that the staff that was allocated to their departments did not have  
405           specialised qualifications in SCU environment.

406           *“You need staff that will understand what is happening.... we don't even have time to*  
407           *orientate them. It's just orientation... You need staff that will understand what is*  
408           *happening.... we don't even have time to orientate them. It's just orientation.” (OM5,*  
409           *Hospital B, Female, from FGD)*

410

#### 411           **Subtheme 4.3: High staff turnover and lack of staff retention**

412           Moreover, some participants expressed their frustration on high staff turnover and lack of  
413           staff retention

414           *“There is also an increase in the number of retiring staff and the management is not*  
415           *recruiting for the vacant posts... they are not doing anything new. The staffing challenge*  
416           *is there. It takes too long to replace staff and you must motivate why you need more*  
417           *staff. Although there may be trained and experienced ICU nurses, they are not enough*

418 *for the number of days and you find yourself not achieving that ratio of 1:” (ANM3,*  
419 *Hospital A, Female, Individual interview)*

#### 420 **Subtheme 4.4: Busy environment**

421 Participants indicated that they work in a very environment, looking after vulnerable  
422 critically ill patients that require individual attention.

423 *“It is very difficult for staff, especially in this busy critical care where there is staff*  
424 *shortages... to now follow up ... because somebody will be having a patient...remember*  
425 *here the ratio here is 1:1 or 1:2.” (ANM3, Hospital A, Female, Individual interview)*

426

427 *“we work with sort of skeleton staff. Every day you wonder how people are going to*  
428 *cope with more admissions.” (OM6, Hospital B, Female, from FGD)*

429

## 430 **Discussion**

431 This study sought to explore the views of the healthcare professionals who were at senior  
432 level, regarding the barriers and facilitators to implementation PSI reporting and learning  
433 guidelines in SCUs. Participants highlighted that although there are stipulated guidelines,  
434 they are not effectively executed by the health care professionals. They reflected more  
435 barriers than facilitators which could be perceived as hindrance the implementation of these  
436 guidelines. All participants acknowledged the importance of revised improvement strategies  
437 to facilitate the rigorous implementation and improvement of quality patient care was  
438 essential.

439

440 **Theme 1: Ineffective reporting system affecting communication of PSI**  
441 **guidelines**

442 In this study, the participants indicated that the difficulty was more on the process of  
443 communication of the PSI reporting and learning guidelines. This was at multi-level,  
444 amongst the individuals, departments, senior management and the way the whole system is  
445 structured. Also, an organisational patient safety cultures must be cultivated to create an  
446 atmosphere that is conducive to communication of these guidelines. Barriers that were  
447 mostly mentioned by the participants included a laborious inconveniencing process, unclear  
448 guidelines and policies, not simple and user-friendly, lack of consultation at the coalface  
449 and lack of feedback [1, 10, 11]. Several studies confirm that clear, standardised effective  
450 communication is key to effective implementation by the healthcare professionals. Although  
451 participants in Hospital B demonstrated a positive attitude to the implementation of PSI  
452 reporting and learning guidelines, as they stated that they were partially involved during the  
453 consultative process, this was not the case in hospital A and C, as they indicated that they  
454 were never consulted. The government plays a critical role in monitoring and evaluation of  
455 the implemented PSI guidelines, therefore the lack of involvement of Department of health  
456 in managing incident reporting means that they are not aware of patient safety issues in the  
457 hospitals in their regions [28]

458 Lack of feedback to the staff and patients and uncertainty about what to report does not  
459 encourage the healthcare professionals to use the reporting system effectively, hence the  
460 participants indicated that there was a lot of undocumented PSIs [3, 11, 15]. Participants  
461 also indicated that there is no learning that takes place, where healthcare professionals can  
462 use the PSI as learning opportunity to prevent recurrences, as they learn from their mistakes.  
463 It is important that healthcare professional do not rely on reporting incidents only as reports

464 often do not lead to positive change [11]. Participants also stated that the feedback to patients  
465 and families is partial, only if it is a major event. Martos Algarra (29) affirms that patients  
466 become first victims and the professionals involved turn into second victims and all of them  
467 need adequate support.

## 468 **Theme 2: Inadequate Institutional and management for the healthcare** 469 **professionals**

470 Investing in patient safety culture can be viewed as building an organizational resource,  
471 which is beneficial for both improving the care quality and protecting staff well-being [9].  
472 There is a need for more effective transformational leadership to facilitate a culture of  
473 patient safety incident reporting and effective implementation of PSI reporting and learning  
474 guidelines [22]. In this study, participants explained an atmosphere that is hostile, punitive  
475 and lack of support of the frontline healthcare workers from the management [11, 22]. Fear  
476 of negative repercussion and litigation were the main barriers of implementation of PSI  
477 reporting and learning guidelines [30]. According to Ontario (30), Lee, Wu (31), a non-  
478 punitive, confidential, independent, expert analysis, timely, system-oriented, and  
479 responsive, was suggested, a hospital should particularly pay more attention to the  
480 confidentiality of case data in the system, when establishing an incident reporting system,  
481 to avoid disputes and enhance reporting intention. Lack of teamwork and collaboration with  
482 other departments and institutions was also mentioned by the participants. A similar study  
483 highlighted a lack of collaboration between physicians and other health care personnel  
484 functioned as a barrier to improved patient safety due to perceived hierarchical differences.  
485 [10]. Participants also stated that although they had risk management meeting to discuss  
486 PSIs, there was a lack of guidance in the form of patient safety committees, implementation  
487 strategy and standard operational procedure, that was of common knowledge. A similar

488 study highlighted that the availability and use of written protocols that provide structure for  
489 their work, such as guidelines and standardized care plans, positively influence patient  
490 safety [10]. According to Dhamanti, Leggat (28) Lack of commitment to and priority of  
491 patient safety, the complexity of the bureaucratic structure, and a lack of systematic  
492 partnership and collaboration are problems that need to be addressed by systematic  
493 improvement.

### 494 **Theme 3: Insufficient education and training of healthcare professionals**

495 Insufficient education and training that was expressed by participants was multifaced.  
496 Participants mentioned poorly qualified healthcare professionals with no skills of working  
497 in a specialised care environment. Insufficient skills could act as a barrier to enhanced  
498 patient safety. Being a newly graduated nurse was mentioned as a barrier, due to a general  
499 lack of experience and the need for learning concerning many new aspects of work [10].  
500 Also, there was a lack on how to identify PSIs, how to construct a written report, inadequate  
501 in-service training. A similar study confirm that lack of knowledge about incident reporting  
502 systems, and lack of understanding about what constitutes an error was reported as common  
503 barrier [30]. The government plays a critical role in ensuring patient safety in health care  
504 services as they are actively involved in designing the guidelines and development of  
505 policies. Therefore, either the government or medical institute managers should collect and  
506 analyse the information in the system, reduce the reoccurrence of medical errors through  
507 education and training and improvement activities, and enhance the patient safety culture of  
508 the hospital [28]

509

510 **Theme 4: Poor Human resources affecting the implementation of PSI**  
511 **guidelines**

512 Participants reported the lack of human resources was not only insufficient number of the  
513 staff allocated to the specialised care units, but skill mix was also lacking. The staff shortage  
514 was due to increased number of the staff at a retirement age, staff resigning for better  
515 employment remuneration, recruitment by other countries for competent staff. This brain  
516 drain could be associated with a burnout syndrome, therefore poor implementation of PSI  
517 reporting and learning guidelines. The specialised care units are characterised by a busy,  
518 stressful environment, with increased to work overload, working with a skeleton staff might  
519 lead to burnout [32]. Shortage of staff and increased workload was associated poor  
520 implementation of the PSI reporting guidelines [9, 16, 28]. Mossburg and Himmelfarb (32),  
521 affirm that healthcare managers can consider a simpler measure of this resource in ensuring  
522 adequate staffing levels across all departments of the institution.

523 **Strengths and limitations of the study**

524 This study provided thought provoking findings as in-depth information was collected from  
525 the interviews from the focus group discussions and individual interviews from participants  
526 who were at the managerial positions and were actively involved in the implementation of  
527 PSI reporting and learning guidelines. In addition, the purposive sample from the focus  
528 group was homogenous, whereas the individual interviews were heterogenous, which  
529 provided a rich information of experiences from a various healthcare professional. To the  
530 researchers' knowledge this is the first study to enlighten the barriers to implementation of  
531 PSI reporting and learning guidelines by the healthcare professionals in South African  
532 SCUs. Furthermore, the study findings may inform the policy makers and healthcare

533 facilities to revise the PSI reporting guidelines, to be more relevant to the South African  
534 context and devise better implementation strategy, to improve patient safety care. In  
535 addition, the findings from this study have identified areas that need improvement in  
536 patient's safety, therefore its dissemination contributes to the cultivation of patient safety  
537 culture worldwide. The study participants were limited to three major government hospitals  
538 in KwaZulu-Natal, and this main limitation of the study, however the sample was  
539 representative, therefore enough to address the research question. Also, most of the literature  
540 that supported this study is more international, there is paucity of South African literature.

## 541 **Recommendations**

542 This study was conducted in one province, therefore further research is recommended to be  
543 conducted in other provinces. The study research analysis and results can be used by global  
544 and country stake holders to improve the implementation of PSI reporting and learning  
545 guidelines, as per WHO recommendation. For rigorous implementation in South African  
546 SCUs, the study recommends revised PSI reporting and learning guidelines that consist of  
547 standardised, simple -user-friendly terminology as well as a better implementation strategy  
548 to guide the healthcare professionals to implement the guidelines effectively. These  
549 guidelines need to be designed in consultation with the frontline healthcare professionals by  
550 the policymakers. Continuous professional development programmes may play an  
551 important role in facilitating the implementation process. Education on PSIs reporting and  
552 learning guidelines should be incorporated early in the curriculum of healthcare  
553 professionals, so that it becomes common knowledge for all.

## 554 **Conclusion**

555 This study confirmed that PSI reporting and learning guidelines are still not effectively  
556 implemented in the SCUs and the barriers of implementation were highlighted. There is a  
557 need to implement these guidelines in middle and low-income countries, including South  
558 Africa. The study revealed that ineffective reporting system, lack of institutional and  
559 managerial support, insufficient education and training of healthcare professionals and poor  
560 human resources were the main barriers to effective implementation of PSI and learning  
561 guidelines. To effectively improve patient safety, this study seeks to strengthen  
562 collaboration among the healthcare professionals, organisations, within the African  
563 continent and globally.

## 564 **Supporting information**

565 **S1 Appendix: Interview guide for the focus group discussion**

566 **S2 Appendix: Individual Interview guide**

567

## 568 **Acknowledgement**

569 The authors would like to acknowledge the gatekeepers and the healthcare professionals  
570 from the three hospitals, who assisted and participated in the study.

## 571 **Author contributions.**

572 **Conceptualization:** TMH Gqaleni, SW Mkhize

573 **Study design, data collection:** TMH Gqaleni.

574 **Formal analysis:** TMH Gqaleni.

575 **Investigation:** TMH Gqaleni.

576 **Methodology:** TMH Gqaleni.

577 **Project administration:** TMH Gqaleni.  
578 **Resources:** TMH Gqaleni.  
579 **Supervision:** SW Mkhize.  
580 **Validation:** SW Mkhize.  
581 **Writing – original draft:** TMH Gqaleni.  
582 **Writing – review & editing:** TMH Gqaleni, SW Mkhize.  
583  
584 **Conflict of interest:** None  
585  
586  
587  
588  
589  
590  
591  
592  
593  
594  
595  
596  
597  
598  
599  
600

## References

- 602 1. Yali G, Nzala SH. Healthcare Providers' Perspective on Barriers to Patient Safety  
603 Incident Reporting in Lusaka District. *Journal of Preventive and Rehabilitative*  
604 *Medicine*. 2022;4(1):44-52. [https://doi: 10.21617/jprm2022.417](https://doi.org/10.21617/jprm2022.417)
- 605 2. WHO. National Guideline for Patient Safety Incident Reporting and Learning in  
606 the Public Health Sector of South Africa. World Health Organization; 2017.
- 607 3. Flott K, Fontana G, Darzi A. The global state of patient safety. London: Imperial  
608 College London. 2019.
- 609 4. James JT. A new, evidence-based estimate of patient harms associated with  
610 hospital care. *Journal of patient safety*. 2013;9(3):122-8.  
611 <https://www.jstor.org/stable/26633011>
- 612 5. Makary MA, Daniel M. Medical error—the third leading cause of death in the US.  
613 *Bmj*. 2016;353. <https://www.jstor.org/stable/26942667>
- 614 6. Lt K. To err is human: building a safer health system. Institute of Medicine,  
615 Committee on Quality of Health Care in America. 2000.
- 616 7. National Academies of Sciences E, Medicine. Crossing the global quality chasm:  
617 Improving health care worldwide: National Academies Press; 2018.
- 618 8. Choi EY, Pyo J, Ock M, Lee S-i. Nurses' perceptions regarding disclosure of  
619 patient safety incidents in Korea: a qualitative study. *Asian Nursing Research*.  
620 2019;13(3):200-8. <https://doi.org/10.1016/j.anr.2019.05.002>
- 621 9. Lu L, Ko Y-M, Chen H-Y, Chueh J-W, Chen P-Y, Cooper CL. Patient Safety and  
622 Staff Well-Being: Organizational Culture as a Resource. *International Journal of*  
623 *Environmental Research and Public Health*. 2022;19(6):3722.  
624 <https://doi.org/10.3390/ijerph19063722>
- 625 10. Ridberg M, Roback K, Nilsen P. Facilitators and barriers influencing patient  
626 safety in Swedish hospitals: a qualitative study of nurses' perceptions. *BMC*  
627 *nursing*. 2014;13:1-12. <https://doi.org/10.1186/1472-6955-13-23>
- 628 11. Alves MdFT, Carvalho DSd, Albuquerque GSCd. Barriers to patient safety  
629 incident reporting by Brazilian health professionals: an integrative review. *Ciencia*  
630 *& saude coletiva*. 2019;24:2895-908. [https://doi.org/10.1590/1413-](https://doi.org/10.1590/1413-81232018248.23912017)  
631 [81232018248.23912017](https://doi.org/10.1590/1413-81232018248.23912017)
- 632 12. Archer S, Hull L, Soukup T, Mayer E, Athanasiou T, Sevdalis N, et al.  
633 Development of a theoretical framework of factors affecting patient safety incident  
634 reporting: a theoretical review of the literature. *BMJ open*. 2017;7(12):e017155.  
635 [https://doi: 10.1136/bmjopen-2017-017155](https://doi.org/10.1136/bmjopen-2017-017155)

- 636 13. Rashed A, Hamdan M. Physicians' and nurses' perceptions of and attitudes toward  
637 incident reporting in Palestinian hospitals. *Journal of patient safety*.  
638 2019;15(3):212-7. [https://doi: 10.1097/PTS.0000000000000218](https://doi.org/10.1097/PTS.0000000000000218)
- 639 14. Khoshakhlagh AH, Khatooni E, Akbarzadeh I, Yazdanirad S, Sheidaei A. Analysis  
640 of affecting factors on patient safety culture in public and private hospitals in Iran.  
641 *BMC health services research*. 2019;19(1):1-14. [https://doi.org/10.1186/s12913-](https://doi.org/10.1186/s12913-019-4863-x)  
642 [019-4863-x](https://doi.org/10.1186/s12913-019-4863-x)
- 643 15. Gqaleni TM, Bhengu BR. Adverse events reporting system as experienced by  
644 critical-care nurses in Kwazulu-Natal, South Africa. *Africa Journal of Nursing and*  
645 *Midwifery*. 2018;20(1):1-14. <https://doi.org/10.25159/2520-5293/2456>
- 646 16. Martos Algarra C. The role of forgiveness in disclosure and victim support after a  
647 patient safety incident. 2022. <http://hdl.handle.net/10803/673273>
- 648 17. Gqaleni T, Mkhize S. Healthcare professionals' perception of knowledge and  
649 implementation of Patient Safety Incident Reporting and Learning guidelines in  
650 specialised care units, KwaZulu-Natal. *Southern African Journal of Critical Care*.  
651 2023;25-30. . <https://doi.org/10.7196/SAJCC.2023.v39i1.559>
- 652 18. WHO. Patient safety tool kit: World Health Organization. Regional Office for the  
653 Eastern Mediterranean; 2015.
- 654 19. Gqaleni TM, Bhengu BR. Analysis of Patient Safety Incident reporting system as  
655 an indicator of quality nursing in critical care units in KwaZulu-Natal, South  
656 Africa. *Health SA Gesondheid*. 2020;25(1):1-  
657 8. <https://doi.org/10.4102/hsag.v25i0.1263>
- 658 20. Dhamanti I, Leggat S, Barraclough S, Tjahjono B. Patient safety incident reporting  
659 in Indonesia: an analysis using World Health Organization characteristics for  
660 successful reporting. *Risk management and healthcare policy*. 2019:331-8.  
661 <http://doi.org/10.2147/RMHP.S222262>
- 662 21. ELMeneza S, AbuShady M. Anonymous reporting of medical errors from The  
663 Egyptian Neonatal Safety Training Network. *Pediatrics & Neonatology*.  
664 2020;61(1):31-5. <https://doi.org/10.1016/j.pedneo.2019.05.008>
- 665 22. Yusuf Y, Irwan AM. The influence of nurse leadership style on the culture of  
666 patient safety incident reporting: a systematic review. *British Journal of Healthcare*  
667 *Management*. 2021;27(6):1-7. <https://doi.org/10.12968/bjhc.2020.0083>
- 668 23. Gong Y. Challenges and Opportunities of Patient Safety Event Reporting.  
669 *Accident and Emergency Informatics*. 2022:133-50.  
670 [https://doi:10.3233/SHTI220014](https://doi.org/10.3233/SHTI220014)
- 671 24. Burns N, Grove SK, Gray JR. *Understanding nursing research-eBook: Building an*  
672 *evidence-based practice*: Elsevier Health Sciences; 2015.
- 673 25. Grove SK, Burns N, Gray J. *The practice of nursing research: Appraisal, synthesis,*  
674 *and generation of evidence*: Elsevier Health Sciences; 2012.

- 675 26. Shenton AK. Strategies for ensuring trustworthiness in qualitative research  
676 projects. *Education for information*. 2004;22(2):63-75. DOI: 10.3233/EFI-2004-  
677 22201
- 678 27. Polit, Beck. *Nursing research: Generating and assessing evidence for nursing*  
679 *practice*. Philadelphia: Wolters Kluwer| Lippincott Williams & Wilkins; 2017.
- 680 28. Dhamanti I, Leggat S, Barraclough S, Liao H-H. Comparison of Patient Safety  
681 Incident Reporting Systems in Taiwan, Malaysia, and Indonesia. *Journal of patient*  
682 *safety*. 2021;17(4):e299-e305. DOI: 10.1097/PTS.0000000000000622
- 683 29. Martos Algarra C. *The role of forgiveness in disclosure and víctima suport after a*  
684 *patient safety incident: Universitat Internacional de Catalunya; 2022.*  
685 <http://hdl.handle.net/10803/673273>
- 686 30. Ontario HQ. *Patient safety learning systems: a systematic review and qualitative*  
687 *synthesis*. Ontario health technology assessment series. 2017;17(3):1.  
688 PMID: 28326148
- 689 31. Lee Y-C, Wu H-H, Weng S-J, Huang Y-C, Hsieh W-L, Huang C-H. *Application of*  
690 *Hospital Information Systems-Construction of an Incident Reporting System*. *TEM*  
691 *Journal*. 2016;5(4).
- 692 32. Mossburg SE, Himmelfarb CD. *The association between professional burnout and*  
693 *engagement with patient safety culture and outcomes: a systematic review*. *Journal*  
694 *of patient safety*. 2021;17(8):e1307-e19.
- 695
- 696
